# Supplementary material for: Sonochemistry-assisted photocontrolled atom transfer radical polymerization enabled by manganese carbonyl
Source: Royal Society of Chemistry journal article supplement (doi:10.1039/d2py00682k), 2022-01-01
Supplement: d2py00682k1.pdf [file d2py00682k1.pdf]

## Supporting Information

### **Sonochemistry-assisted Photocontrolled Atom Transfer Radical Polymerization Enabled by Manganese Carbonyl**

Chen Wang<sup>1</sup>, Wenru Fan<sup>1\*</sup>, Zexuan Li<sup>1</sup>, Jiaqiang Xiong<sup>2</sup>, Wei Zhang<sup>2</sup>, Zhenhua Wang<sup>1\*</sup>

<sup>1</sup>Frontiers Science Center for Flexible Electronics & Xi'an Institute of Biomedical Materials and Engineering (IBME), Northwestern Polytechnical University, Xi'an 710072, China.

<sup>2</sup>Department of Obstetrics and Gynecology, Zhongnan Hospital of Wuhan University, Wuhan 430071, China.

# Table of Contents

|                                                                                                                                                                                                              |    |
|--------------------------------------------------------------------------------------------------------------------------------------------------------------------------------------------------------------|----|
| <b>Figure S1.</b> Conversion analysis by $^1\text{H}$ NMR ( $\text{CDCl}_3$ ) of reaction mixture of SAP-ATRP of BA under the irradiation of single hood light, and the GPC traces. ....                     | 4  |
| <b>Figure S2.</b> Conversion analysis by $^1\text{H}$ NMR ( $\text{CDCl}_3$ ) of reaction mixture of SAP-ATRP of BA under ultrasound, and the GPC traces. ....                                               | 5  |
| <b>Figure S3.</b> Conversion analysis by $^1\text{H}$ NMR ( $\text{CDCl}_3$ ) of reaction mixture of SAP-ATRP of BA under both the irradiation of hood light and ultrasound, and the GPC traces. ....        | 6  |
| <b>Figure S4.</b> Conversion analysis by $^1\text{H}$ NMR ( $\text{CDCl}_3$ ) of reaction mixture of SAP-ATRP of BA with $DP_T = 200$ . ....                                                                 | 7  |
| <b>Figure S5.</b> Conversion analysis by $^1\text{H}$ NMR ( $\text{CDCl}_3$ ) of reaction mixture of SAP-ATRP of BA with $DP_T = 300$ . ....                                                                 | 8  |
| <b>Figure S6.</b> Conversion analysis by $^1\text{H}$ NMR ( $\text{CDCl}_3$ ) of reaction mixture of SAP-ATRP of BA with $DP_T = 400$ . ....                                                                 | 9  |
| <b>Figure S7.</b> Conversion analysis by $^1\text{H}$ NMR ( $\text{CDCl}_3$ ) of reaction mixture of SAP-ATRP of BA with $DP_T = 800$ . ....                                                                 | 10 |
| <b>Figure S9.</b> Conversion analysis by $^1\text{H}$ NMR ( $\text{CDCl}_3$ ) of reaction mixture of SAP-ATRP of MA under both the irradiation of hood light and ultrasound, and the GPC trace. ....         | 11 |
| <b>Figure S10.</b> Conversion analysis by $^1\text{H}$ NMR ( $\text{CDCl}_3$ ) of reaction mixture of SAP-ATRP of EA under both the irradiation of hood light and ultrasound, and the GPC trace. ....        | 12 |
| <b>Figure S11.</b> Conversion analysis by $^1\text{H}$ NMR ( $\text{CDCl}_3$ ) of reaction mixture of SAP-ATRP of MMA under both the irradiation of hood light and ultrasound, and the GPC trace. ....       | 13 |
| <b>Figure S12.</b> Conversion analysis by $^1\text{H}$ NMR ( $\text{CDCl}_3$ ) of reaction mixture of SAP-ATRP of BMA under both the irradiation of hood light and ultrasound, and the GPC trace. ....       | 14 |
| <b>Figure S13.</b> Conversion analysis by $^1\text{H}$ NMR ( $\text{CDCl}_3$ ) of reaction mixture of SAP-ATRP of BzMA under both the irradiation of hood light and ultrasound, and the GPC trace. ....      | 15 |
| <b>Figure S14.</b> Conversion analysis by $^1\text{H}$ NMR ( $\text{D}_2\text{O}$ ) of reaction mixture of SAP-ATRP of SPMA under both the irradiation of hood light and ultrasound, and the GPC trace. .... | 16 |
| <b>Figure S15.</b> Conversion analysis by $^1\text{H}$ NMR ( $\text{CDCl}_3$ ) of PMA-Br. ....                                                                                                               | 17 |
| <b>Figure S16.</b> Conversion analysis by $^1\text{H}$ NMR ( $\text{CDCl}_3$ ) of PMA- <i>b</i> -PEA-Br. ....                                                                                                | 18 |
| <b>Figure S17.</b> Conversion analysis by $^1\text{H}$ NMR ( $\text{CDCl}_3$ ) of <b>ON-OFF</b> , and the GPC traces. ..                                                                                     | 19 |
| <b>Figure S18.</b> Results for the effect of different contents of TPMA on polymerization. ....                                                                                                              | 20 |
| <b>Figure S19.</b> Conversion analysis by $^1\text{H}$ NMR ( $\text{CDCl}_3$ ) of reaction mixture of SAP-ATRP of BA, and the GPC traces. $[\text{Cu}^{\text{II}}]_0 : [\text{TPMA}]_0 = 1:1$ . ....         | 21 |

|                                                                                                                                                                                                |    |
|------------------------------------------------------------------------------------------------------------------------------------------------------------------------------------------------|----|
| <b>Figure S20.</b> Conversion analysis by $^1\text{H}$ NMR ( $\text{CDCl}_3$ ) of reaction mixture of SAP-ATRP of BA, and the GPC traces. $[\text{Cu}^{\text{II}}]_0: [\text{TPMA}]_0 = 1:4$ . | 22 |
| <b>Figure S21.</b> Conversion analysis by $^1\text{H}$ NMR ( $\text{CDCl}_3$ ) of reaction mixture of SAP-ATRP of BA, and the GPC traces. $[\text{Cu}^{\text{II}}]_0: [\text{TPMA}]_0 = 1:6$ . | 23 |
| <b>Table S1.</b> Results for polymerization of various monomers under concurrent stimuli in different solvents.                                                                                | 24 |
| <b>Figure S22.</b> Conversion analysis by $^1\text{H}$ NMR ( $\text{CDCl}_3$ ) of reaction mixture of SAP-ATRP of MA in 50% v/v DMSO, and the GPC trace.                                       | 25 |
| <b>Figure S23.</b> Conversion analysis by $^1\text{H}$ NMR ( $\text{CDCl}_3$ ) of reaction mixture of SAP-ATRP of MA in 50% v/v DMF, and the GPC trace.                                        | 26 |
| <b>Figure S24.</b> Conversion analysis by $^1\text{H}$ NMR ( $\text{CDCl}_3$ ) of reaction mixture of SAP-ATRP of MA in 50% v/v anisole and the GPC trace.                                     | 27 |

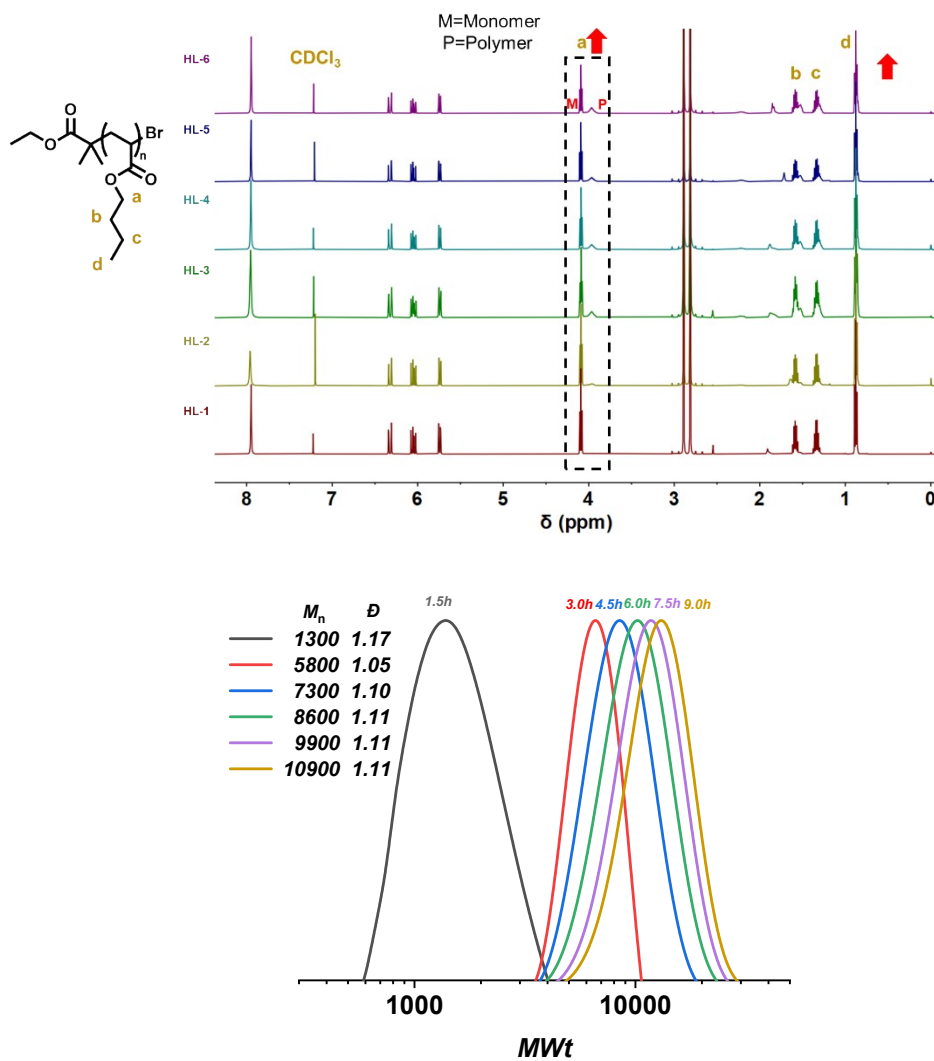

**Figure S1.** Conversion analysis by <sup>1</sup>H NMR (CDCl<sub>3</sub>) of reaction mixture of SAP-ATRP of BA under the irradiation of single hood light, and the GPC traces.

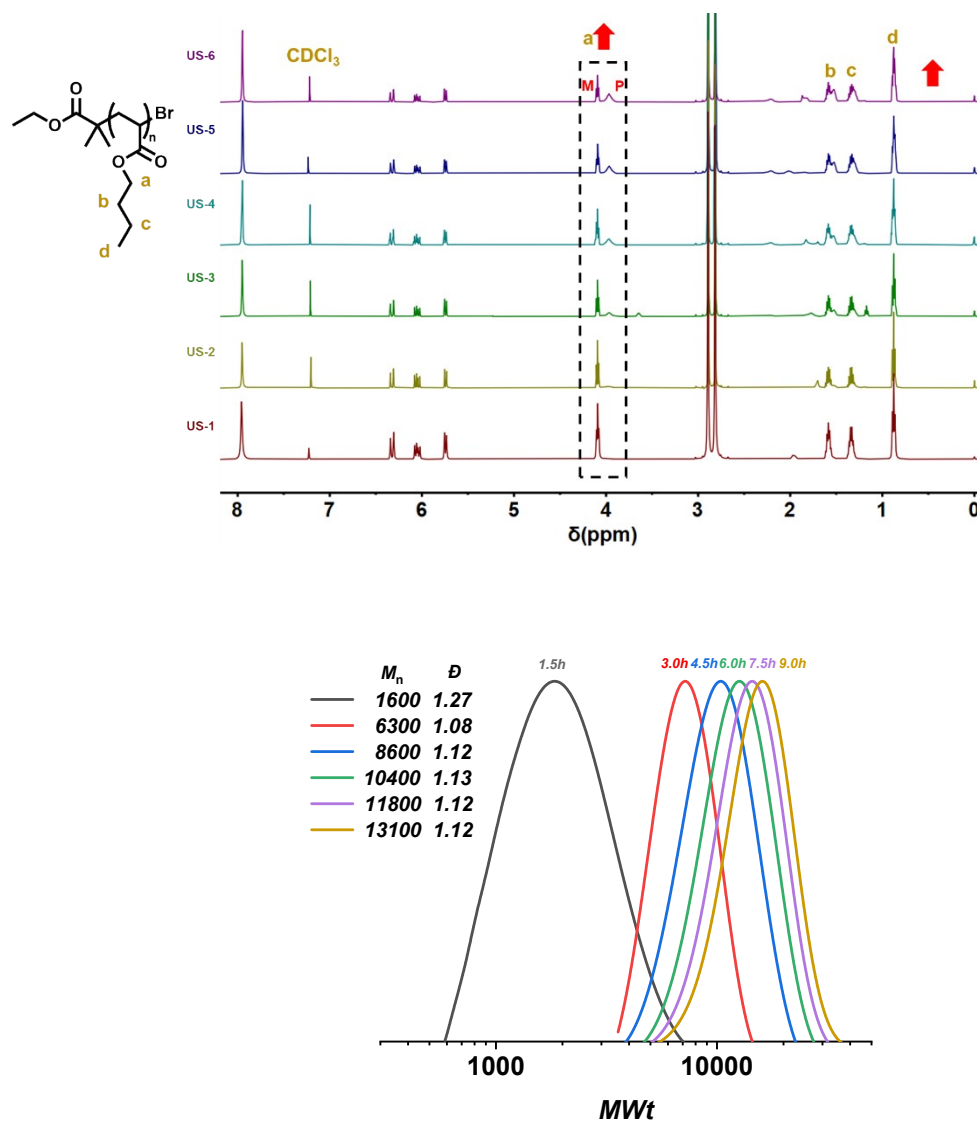

**Figure S2.** Conversion analysis by  $^1\text{H}$  NMR ( $\text{CDCl}_3$ ) of reaction mixture of SAP-ATRP of BA under ultrasound, and the GPC traces.

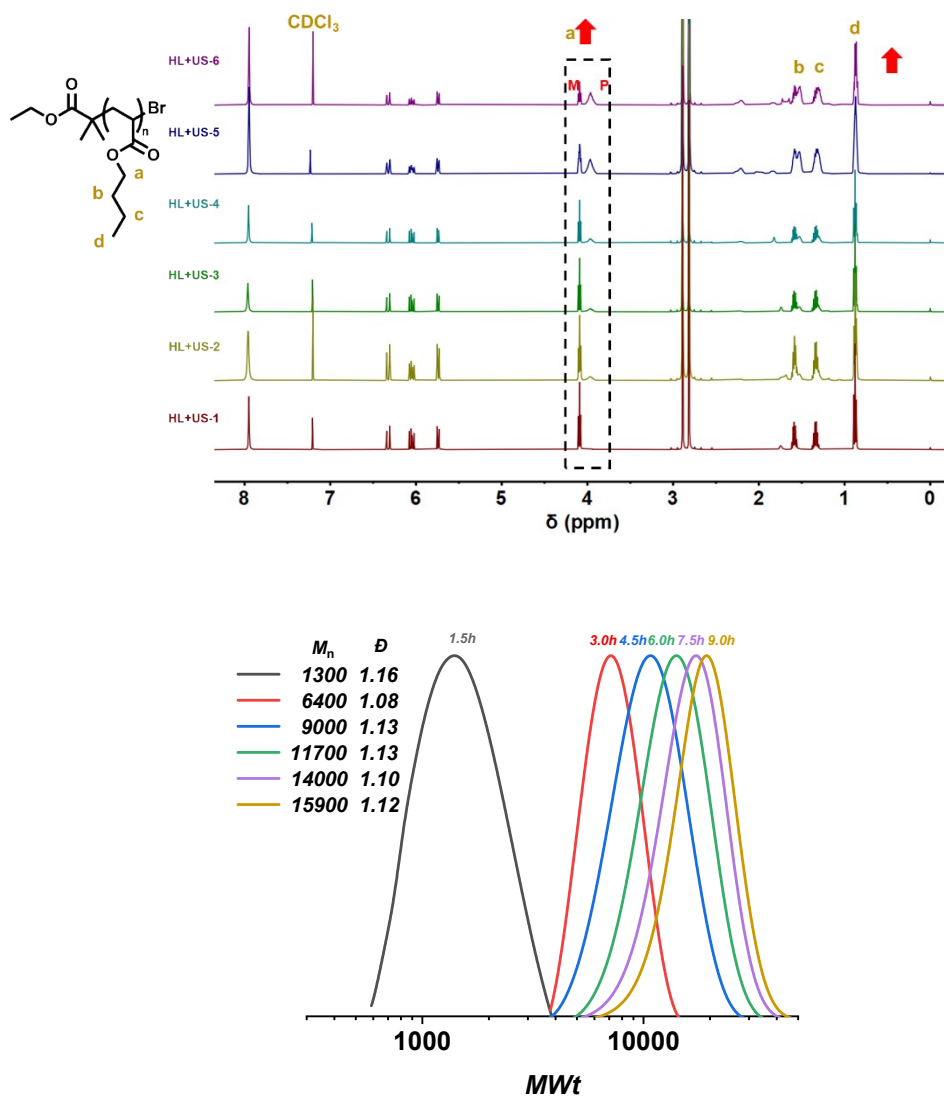

**Figure S3.** Conversion analysis by  $^1\text{H}$  NMR (CDCl<sub>3</sub>) of reaction mixture of SAP-ATRP of BA under both the irradiation of hood light and ultrasound, and the GPC traces.

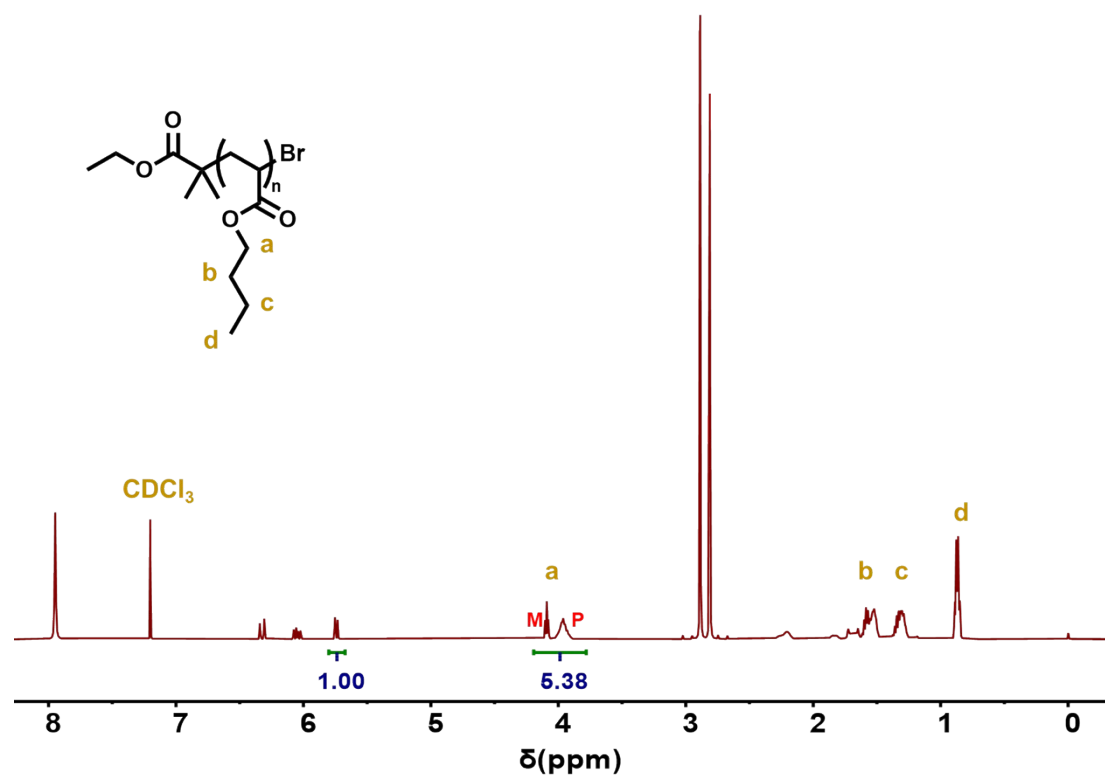

**Figure S4.** Conversion analysis by  $^1\text{H}$  NMR ( $\text{CDCl}_3$ ) of reaction mixture of SAP-ATRP of BA with  $DP_T = 200$ .

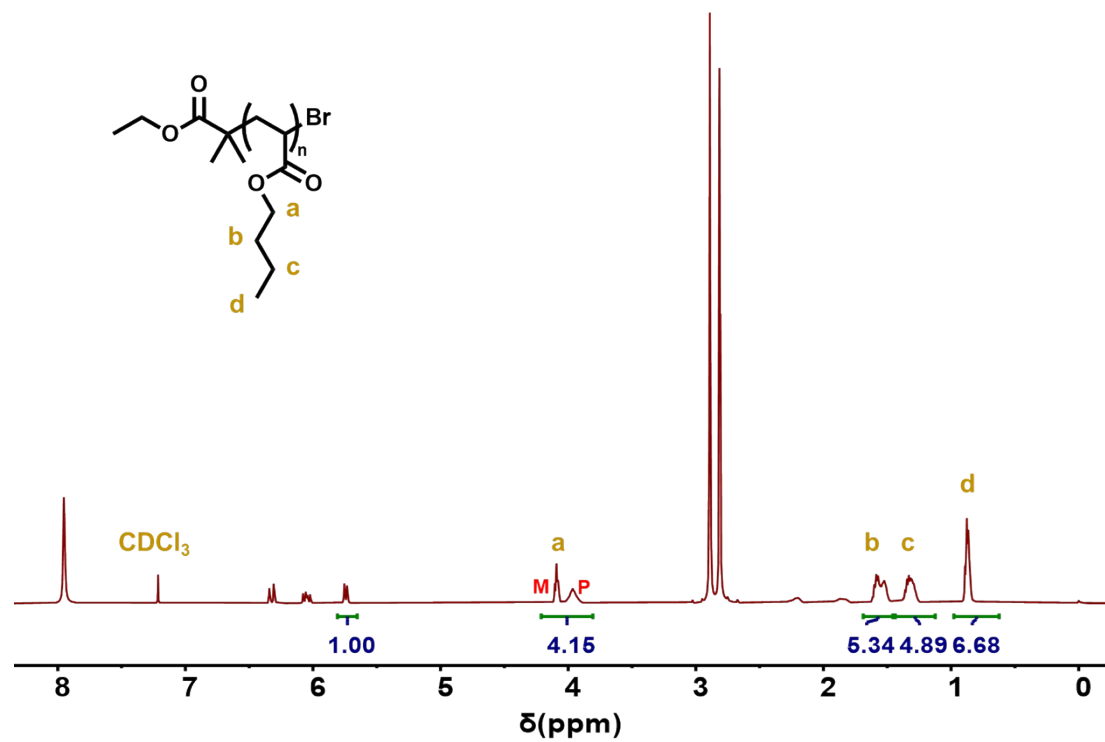

**Figure S5.** Conversion analysis by  $^1\text{H}$  NMR ( $\text{CDCl}_3$ ) of reaction mixture of SAP-ATRP of BA with  $DP_T = 300$ .



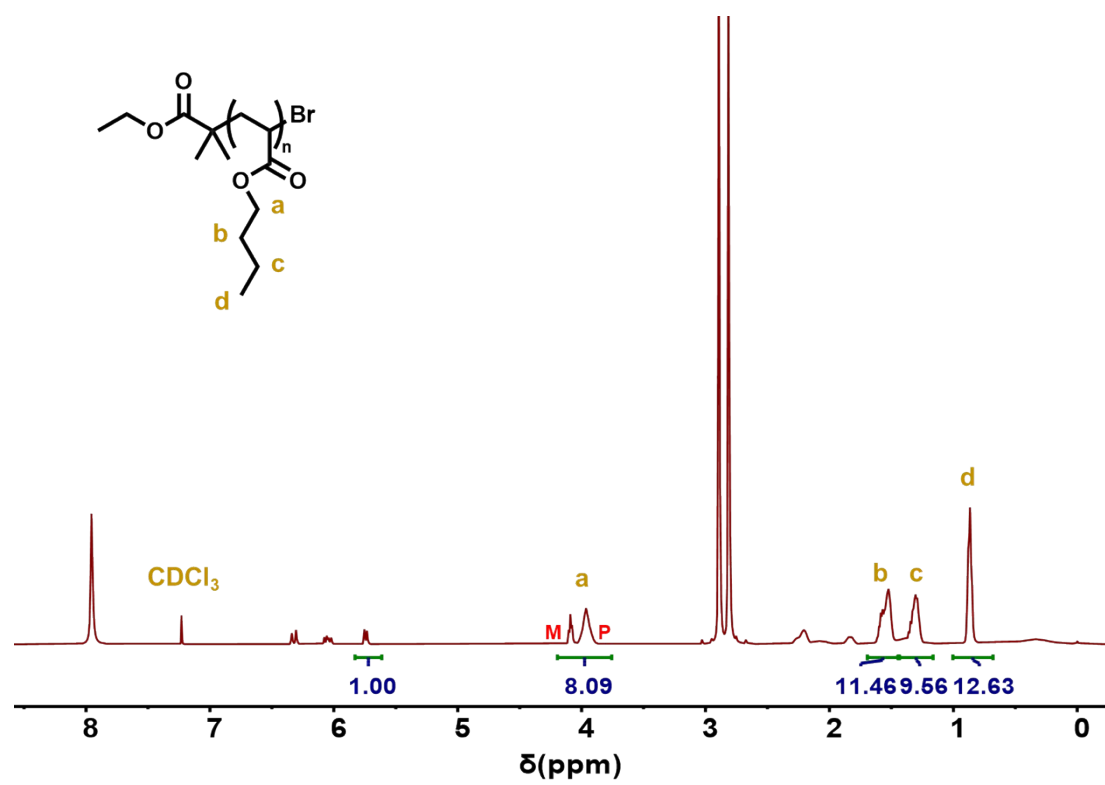

**Figure S6.** Conversion analysis by  $^1\text{H}$  NMR ( $\text{CDCl}_3$ ) of reaction mixture of SAP-ATRP of BA with  $DP_T = 400$ .

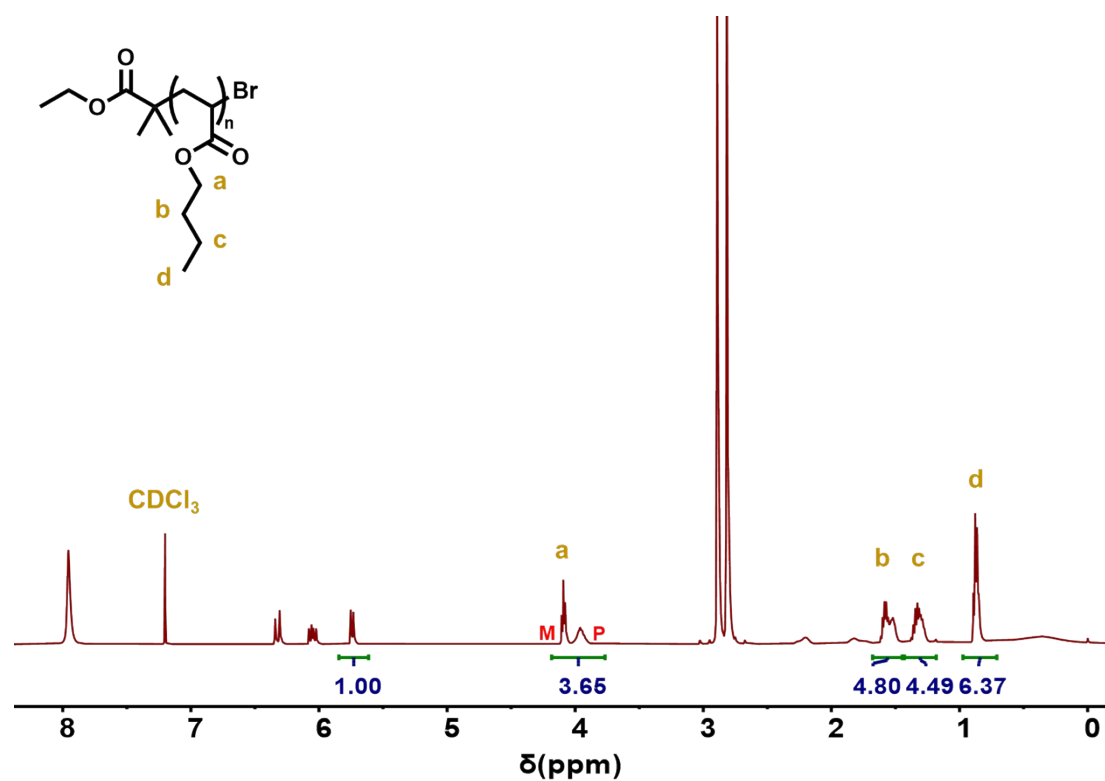

**Figure S7.** Conversion analysis by  $^1\text{H}$  NMR ( $\text{CDCl}_3$ ) of reaction mixture of SAP-ATRP of BA with  $DP_T = 800$ .

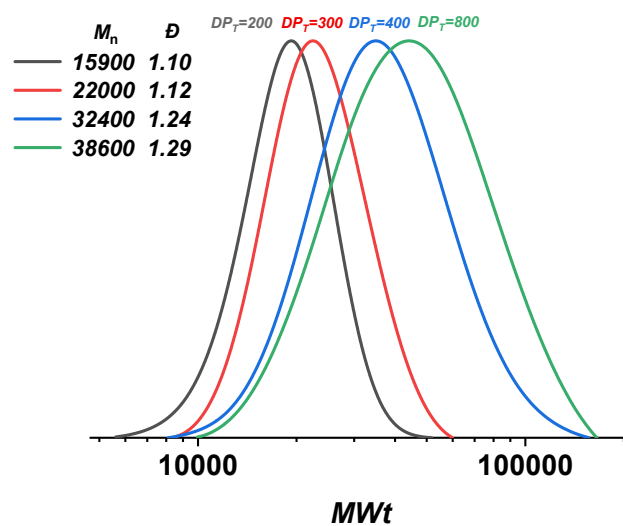

**Figure S8.** GPC traces of SAP-ATRP of BA with different  $DP_T$ .

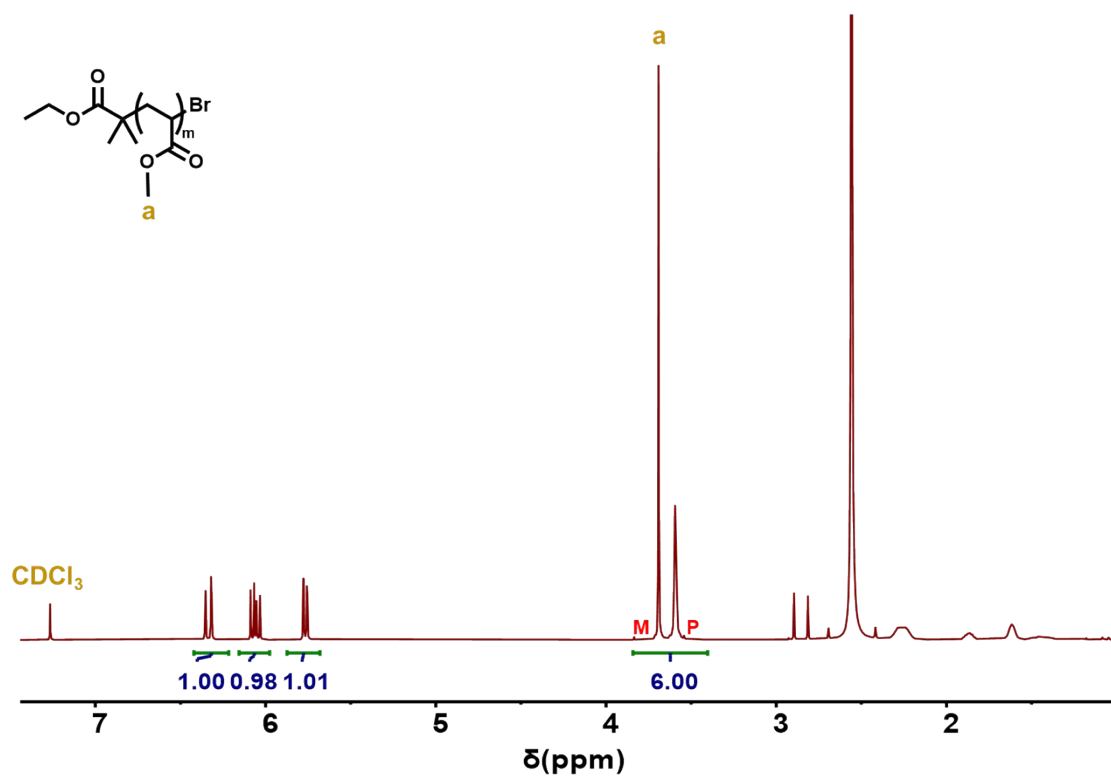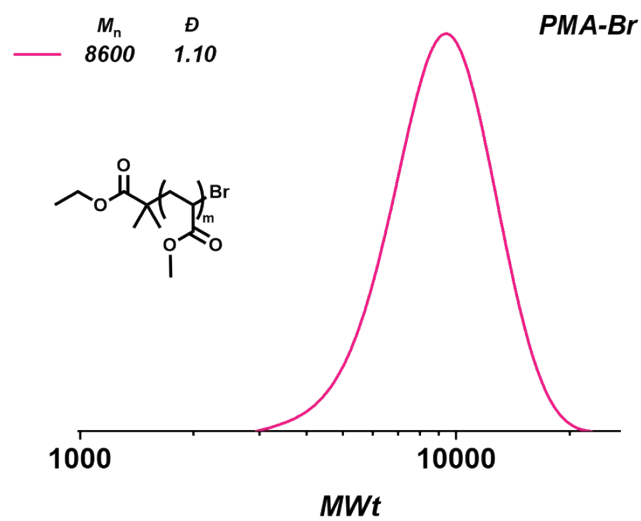

**Figure S9.** Conversion analysis by  $^1\text{H NMR}$  ( $\text{CDCl}_3$ ) of reaction mixture of SAP-ATRP of MA under both the irradiation of hood light and ultrasound, and the GPC trace.

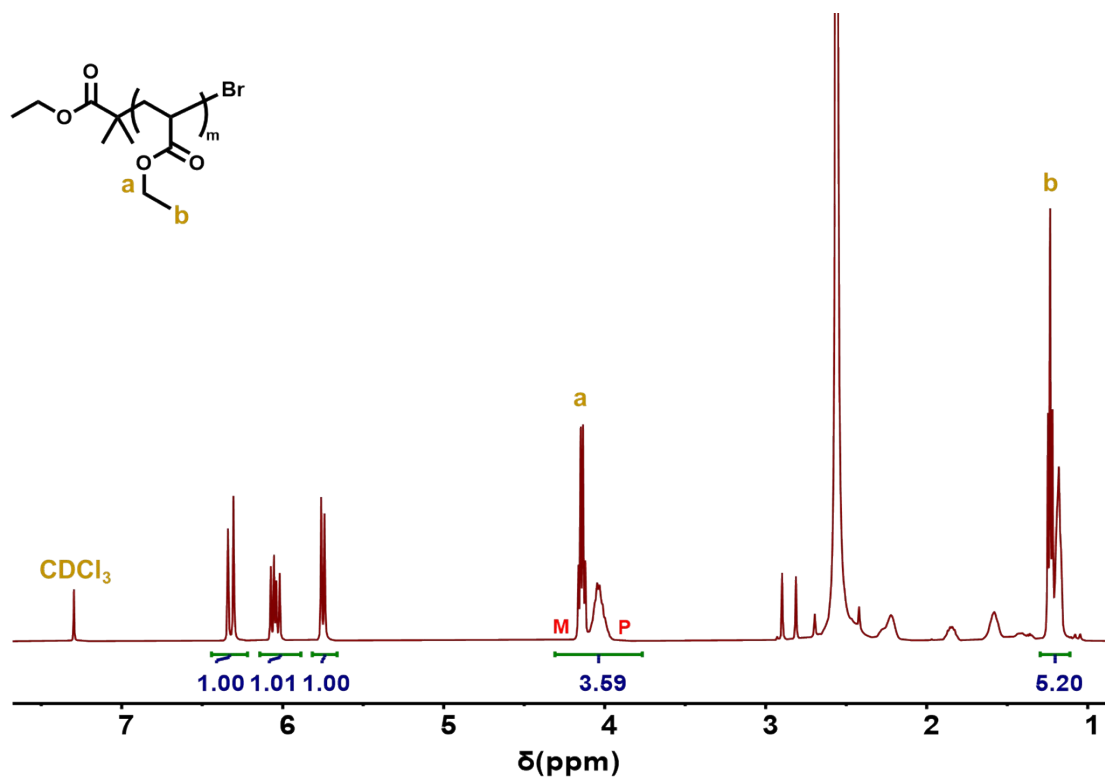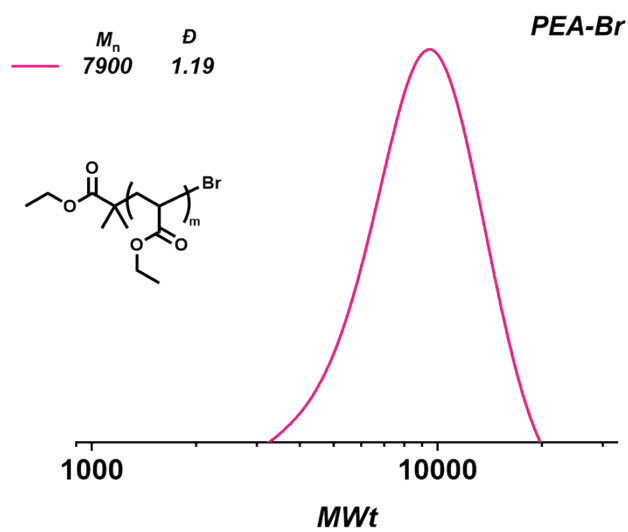

**Figure S10.** Conversion analysis by  $^1\text{H NMR}$  ( $\text{CDCl}_3$ ) of reaction mixture of SAP-ATRP of EA under both the irradiation of hood light and ultrasound, and the GPC trace.

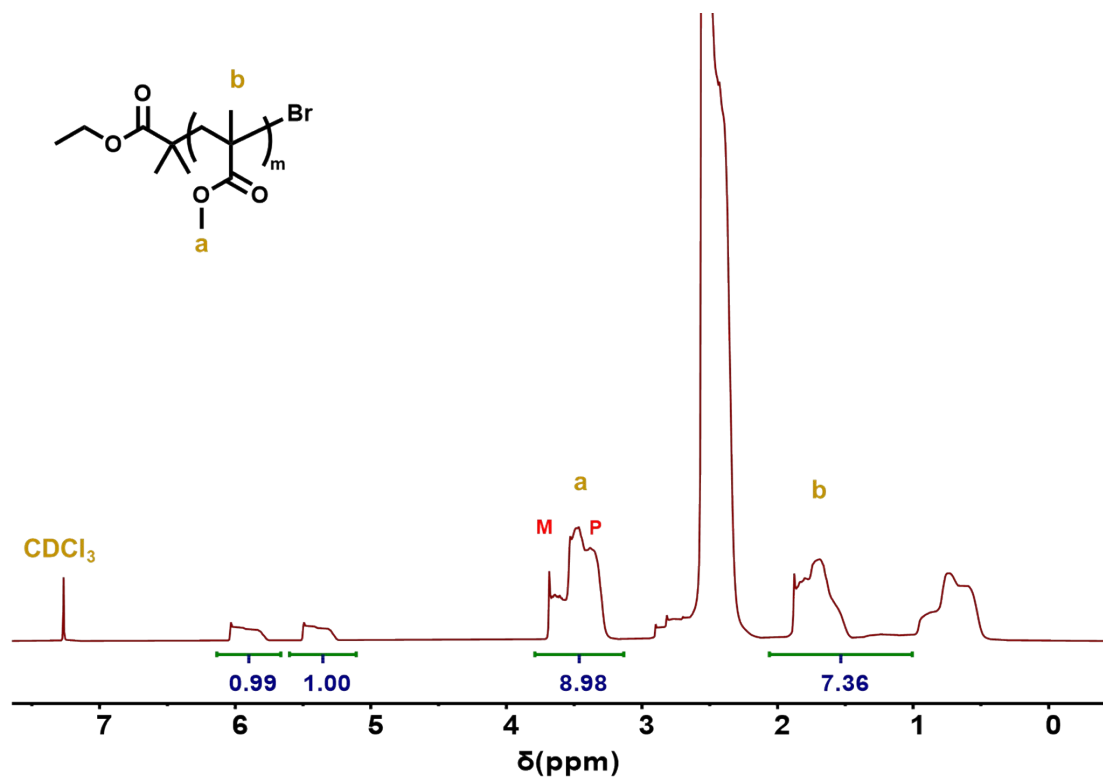

**Figure S11.** Conversion analysis by  $^1\text{H}$  NMR ( $\text{CDCl}_3$ ) of reaction mixture of SAP-ATRP of

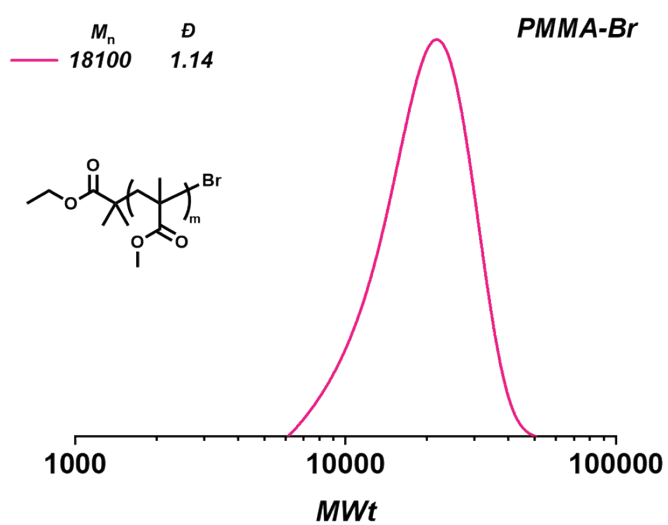

MMA under both the irradiation of hood light and ultrasound, and the GPC trace.

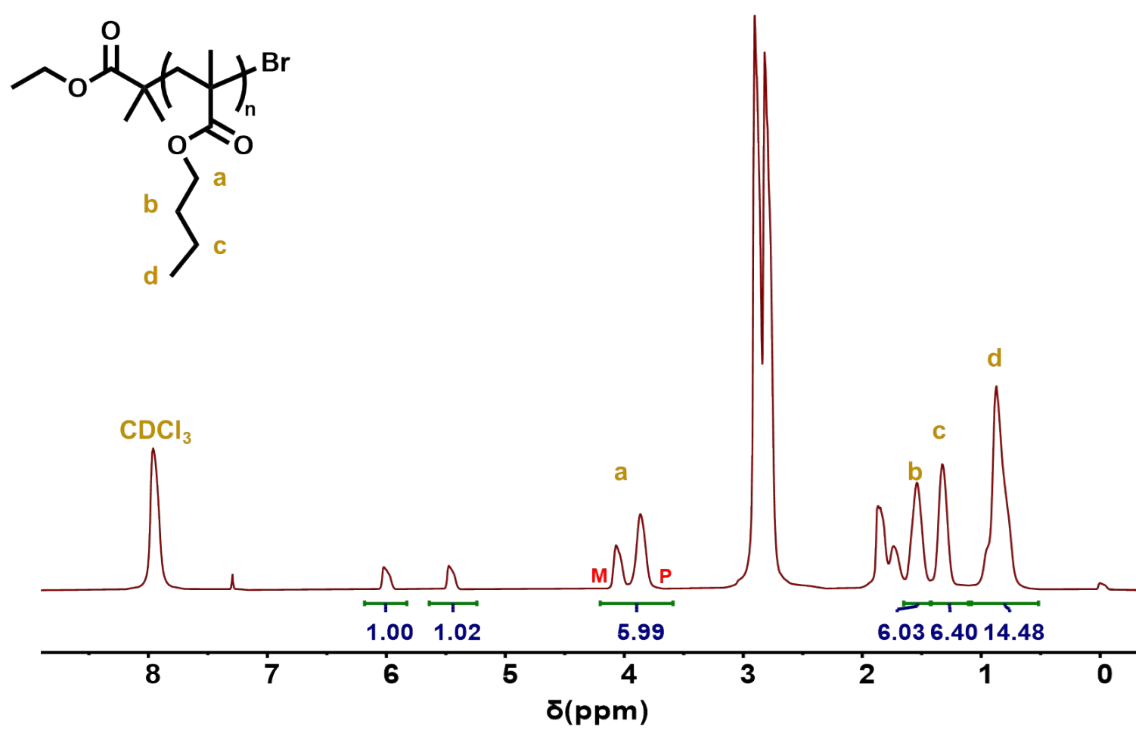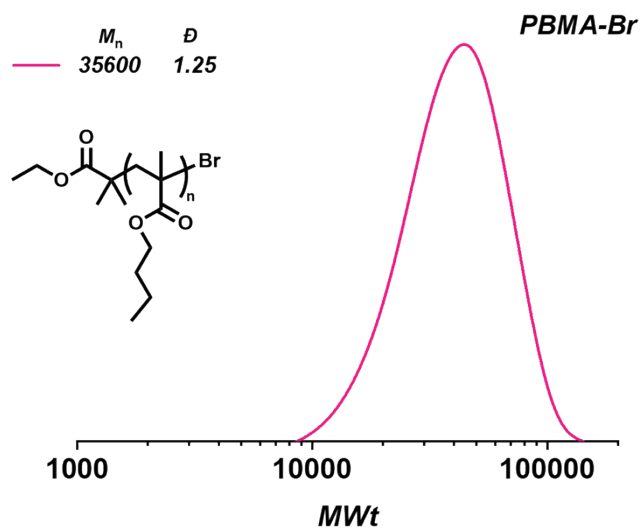

**Figure S12.** Conversion analysis by  $^1\text{H NMR}$  (CDCl<sub>3</sub>) of reaction mixture of SAP-ATRP of BMA under both the irradiation of hood light and ultrasound, and the GPC trace.

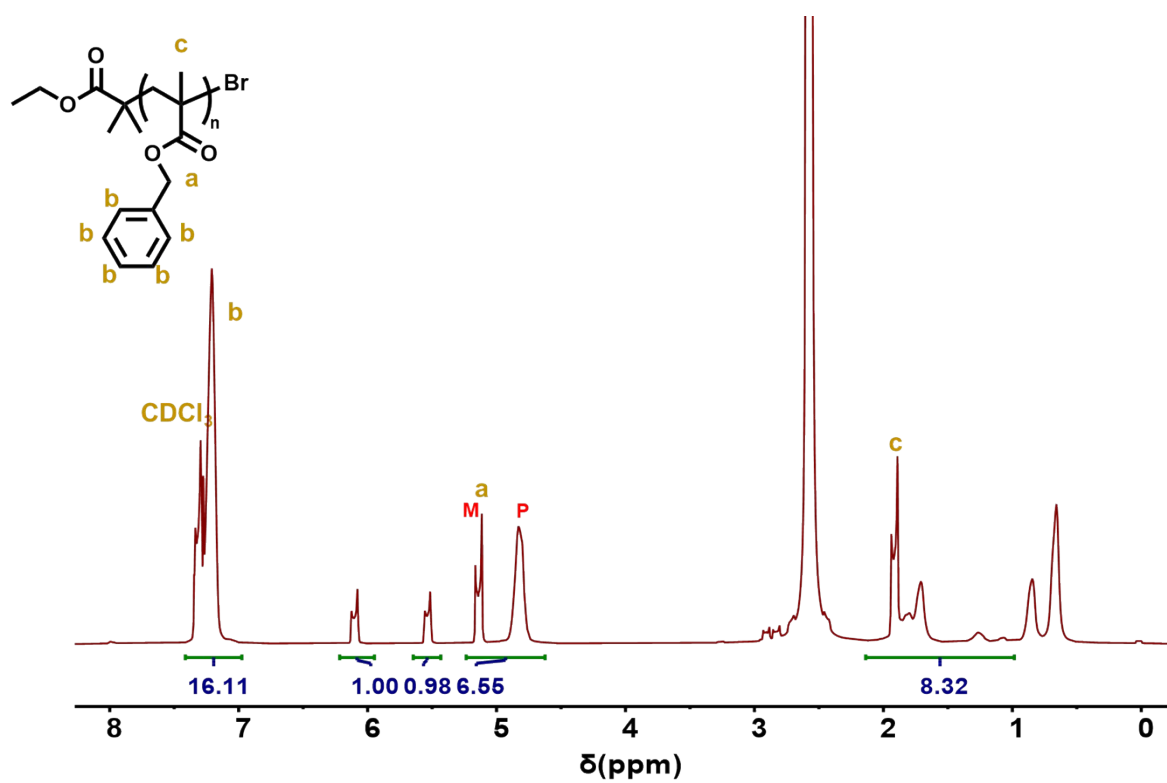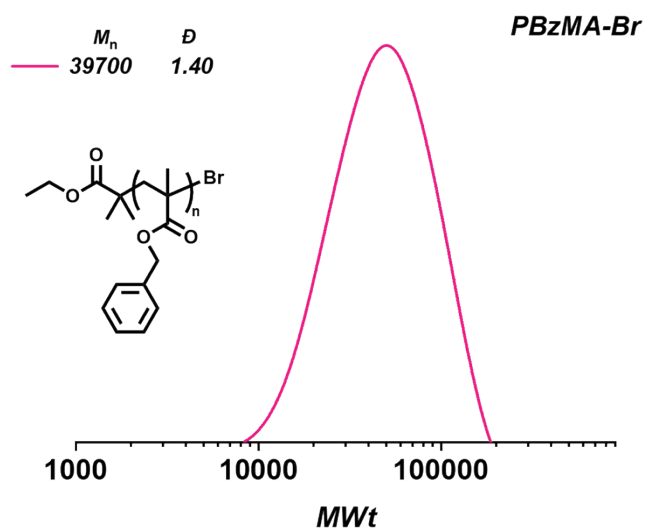

**Figure S13.** Conversion analysis by  $^1\text{H NMR}$  ( $\text{CDCl}_3$ ) of reaction mixture of SAP-ATRP of BzMA under both the irradiation of hood light and ultrasound, and the GPC trace.

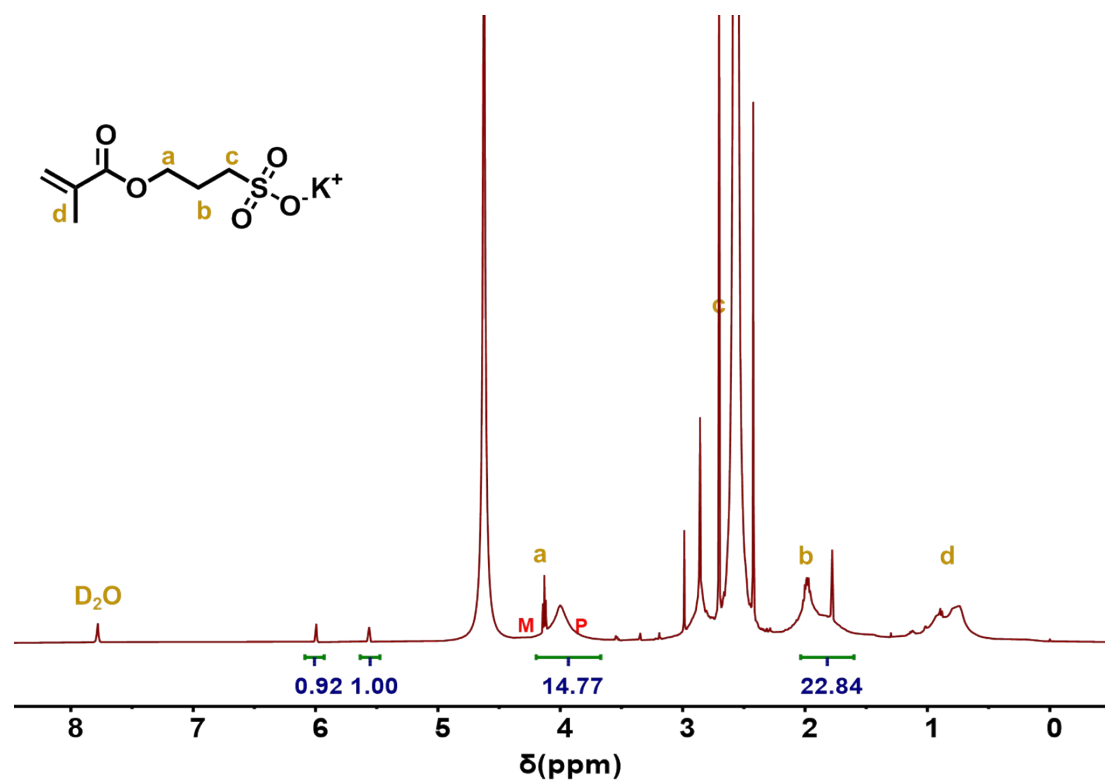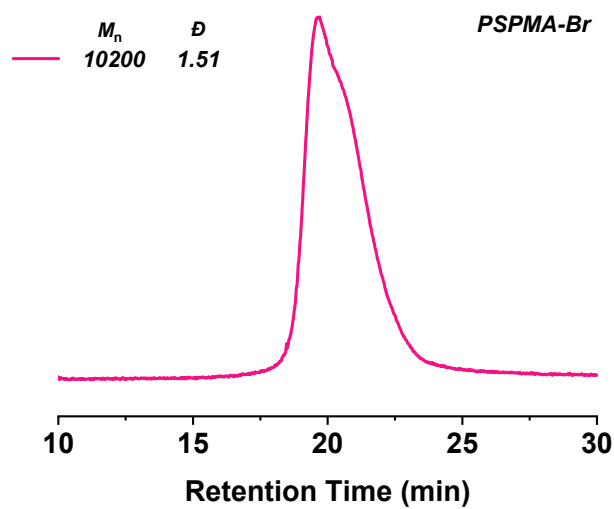

**Figure S14.** Conversion analysis by  $^1\text{H NMR}$  ( $\text{D}_2\text{O}$ ) of reaction mixture of SAP-ATRP of SPMA under both the irradiation of hood light and ultrasound, and the GPC trace.



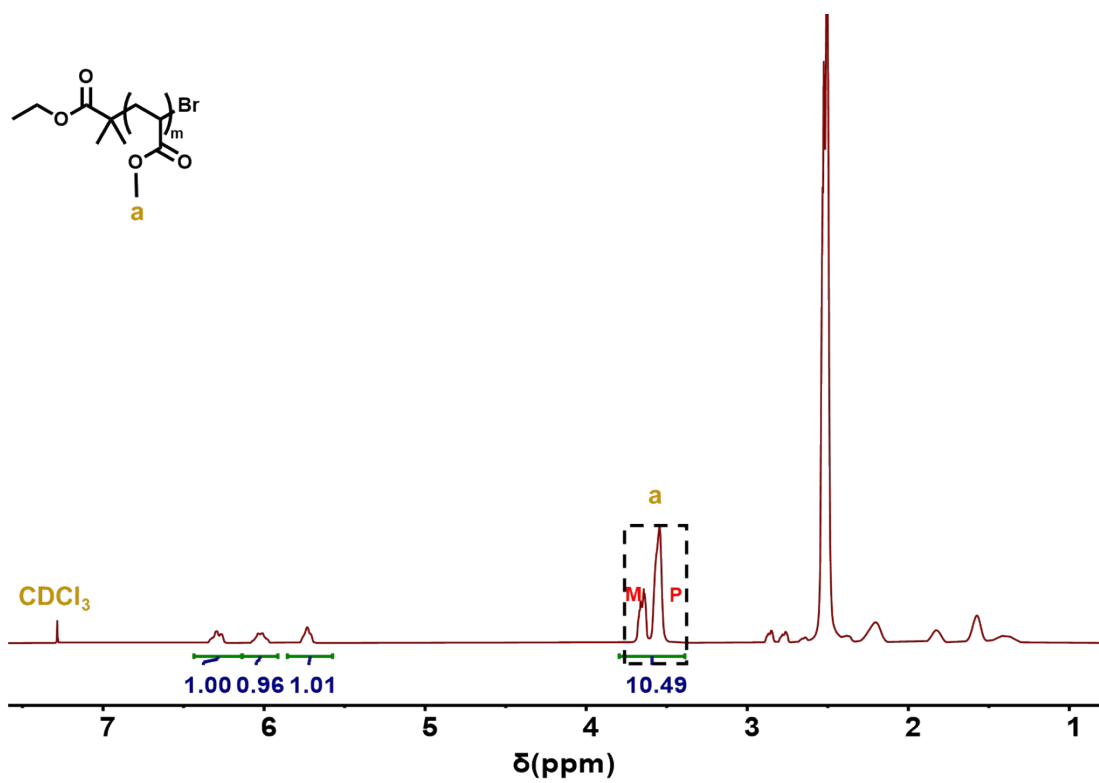

**Figure S15.** Conversion analysis by <sup>1</sup>H NMR (CDCl<sub>3</sub>) of PMA-Br.

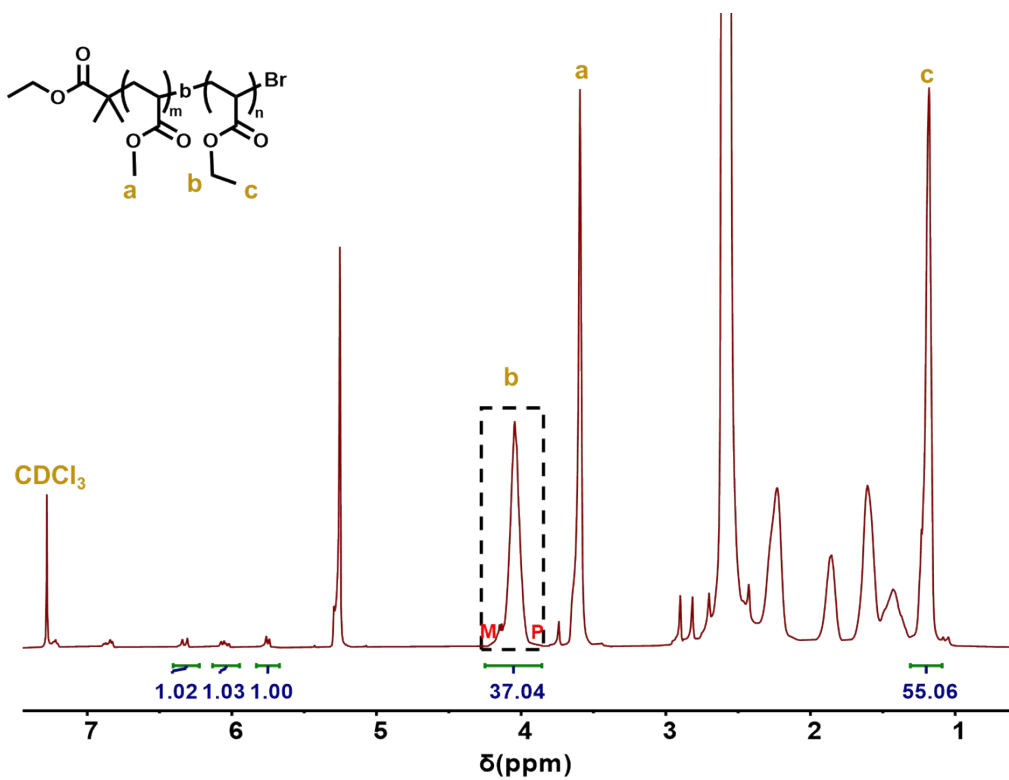

**Figure S16.** Conversion analysis by <sup>1</sup>H NMR (CDCl<sub>3</sub>) of PMA-*b*-PEA-Br.

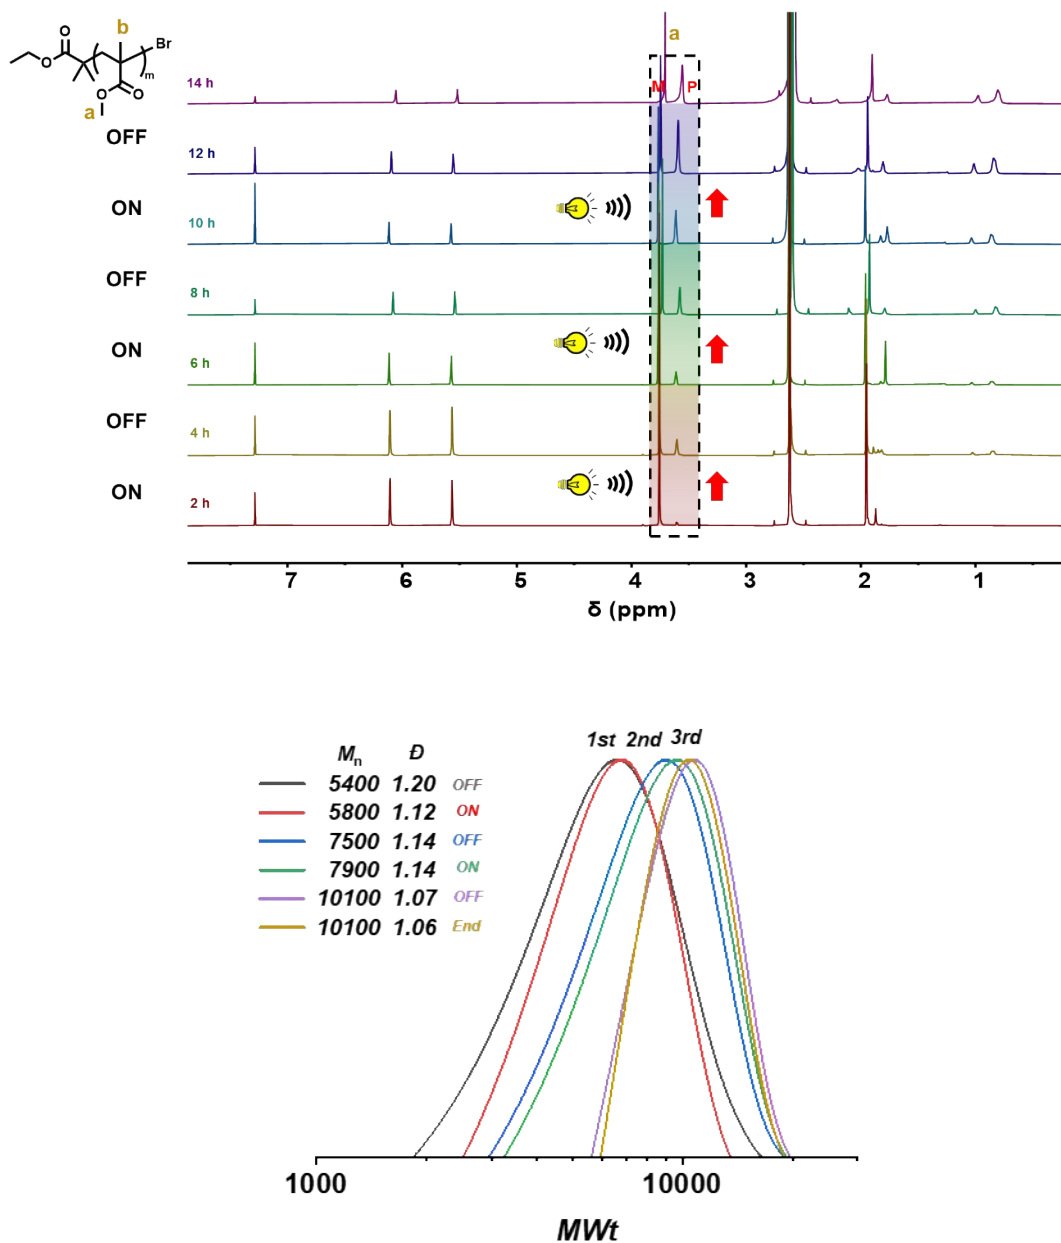

Figure S17. Conversion analysis by  $^1\text{H}$  NMR (CDCl<sub>3</sub>) of *ON-OFF*, and the GPC traces.

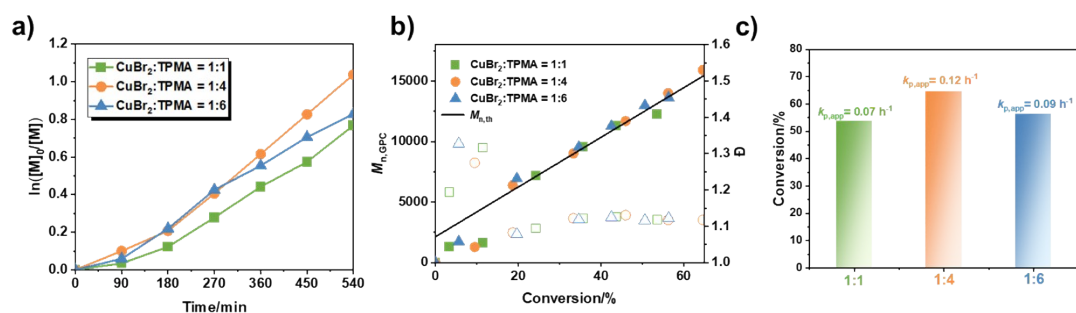

**Figure S18.** Results for the effect of different contents of TPMA on polymerization.  $[BA]_0 : [EBiB]_0 : [CuBr_2]_0 : [TPMA]_0 = 200:1:0.03:X$ , 0.45 wt %  $Mn_2(CO)_{10}$ , in 50% (v/v) DMF. (a) Semi-logarithmic kinetic plots evolution of polymerization under various stimuli. (b) Number-average molecular weight and molecular weight distribution ( $\bar{M}_w/\bar{M}_n$ ). (c) Conversion and apparent rate of the reaction.

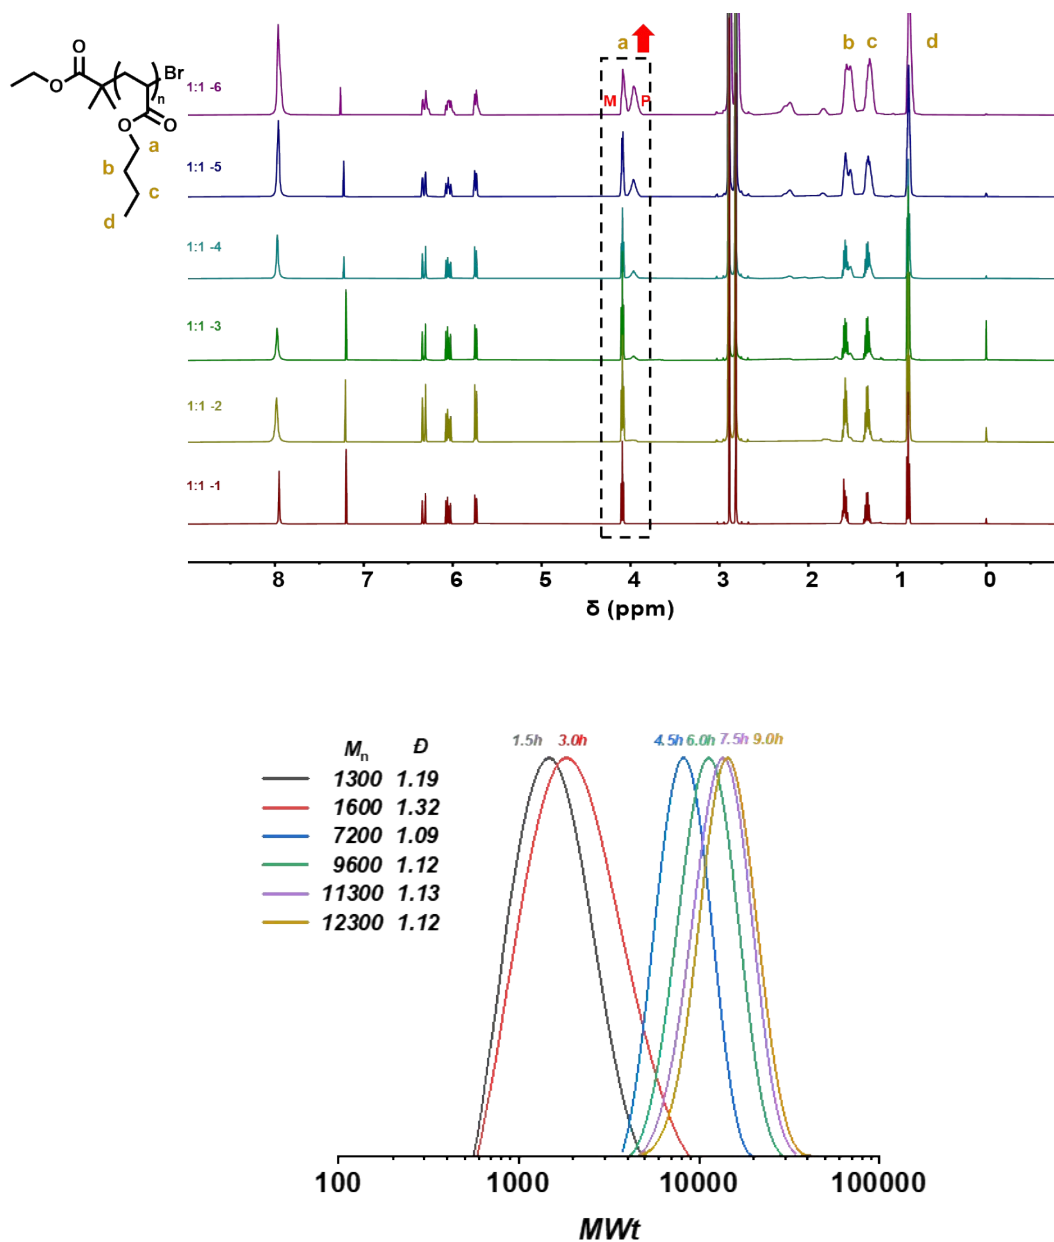

**Figure S19.** Conversion analysis by  $^1\text{H}$  NMR (CDCl<sub>3</sub>) of reaction mixture of SAP-ATRP of BA, and the GPC traces.  $[\text{Cu}^{\text{II}}]_0: [\text{TPMA}]_0 = 1:1$ .

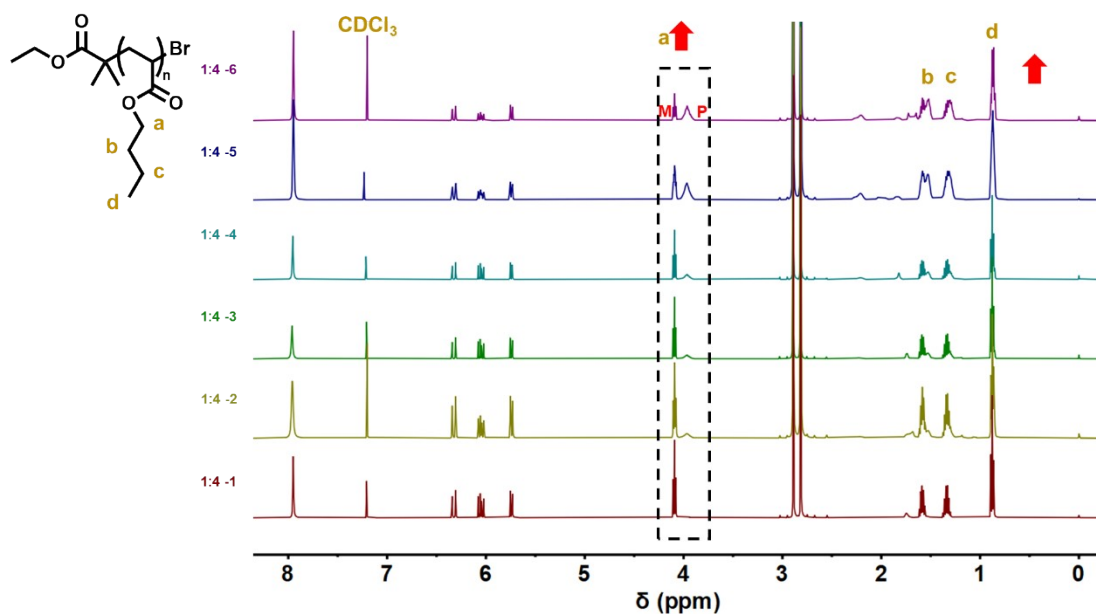

**Figure S20.** Conversion analysis by  $^1\text{H}$  NMR ( $\text{CDCl}_3$ ) of reaction mixture of SAP-ATRP of BA,

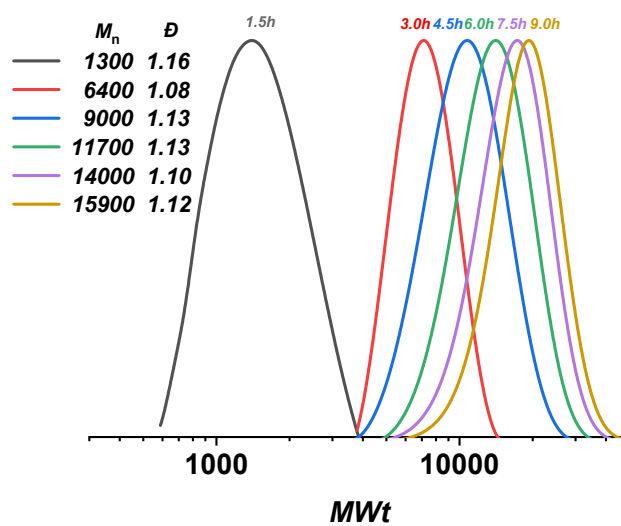

and the GPC traces.  $[\text{Cu}^{\text{II}}]_0: [\text{TPMA}]_0 = 1:4$ .

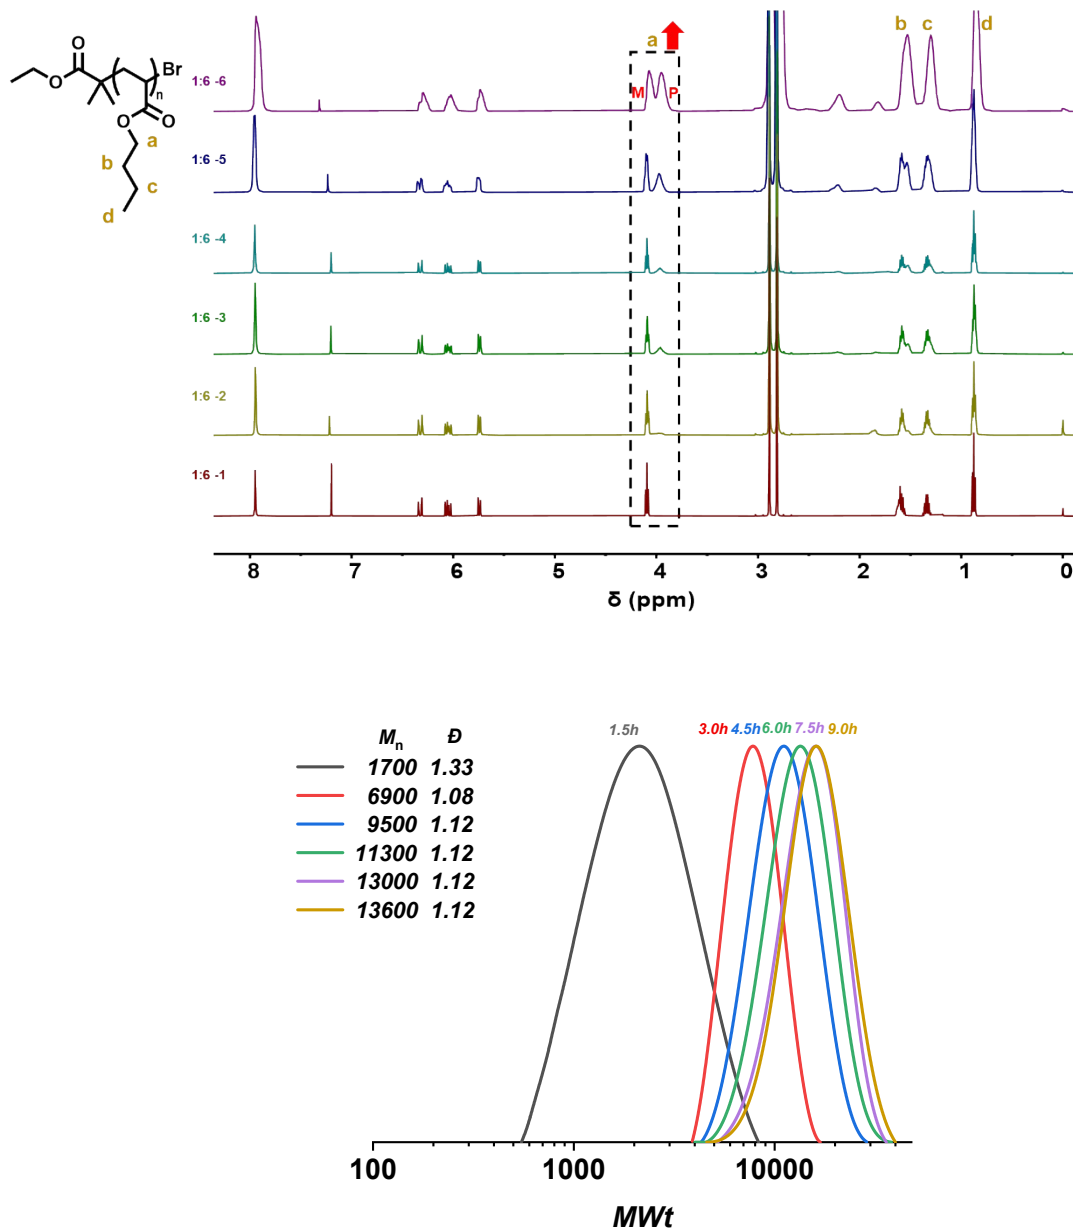

**Figure S21.** Conversion analysis by  $^1\text{H}$  NMR ( $\text{CDCl}_3$ ) of reaction mixture of SAP-ATRP of BA, and the GPC traces.  $[\text{Cu}^{\text{II}}]_0: [\text{TPMA}]_0 = 1:6$ .

**Table S1.** Results for polymerization of various monomers under concurrent stimuli in different solvents.

| Entry <sup>a</sup> | Monomer | Solvent | T(h) | Conversion <sup>b</sup> | $M_{n,th}$ <sup>c</sup> | $M_{n,GPC}$ <sup>d</sup> | $\bar{D}$ <sup>d</sup> |
|--------------------|---------|---------|------|-------------------------|-------------------------|--------------------------|------------------------|
| 1                  | MA      | DMSO    | 5    | 50%                     | 8800                    | 8600                     | 1.10                   |
| 2                  | MA      | DMF     | 5    | 50%                     | 8800                    | 8300                     | 1.08                   |
| 3                  | MA      | Anisole | 5    | 8%                      | 1600                    | 3700                     | 2.73                   |

<sup>a</sup> Reaction conditions:[MA]<sub>0</sub>:[EBiB]<sub>0</sub>:[CuBr<sub>2</sub>]<sub>0</sub>:[TPMA]<sub>0</sub>= 200:1:0.03:0.18 in 50% (v/v) DMSO/DMF/anisole, Magnetic stirring with a rod stirrer.<sup>b</sup> Conversion determined by <sup>1</sup>H NMR.<sup>c</sup> Calculated on the basis of conversion (i.e.,  $M_{n,th}=M_{EBiB}+[Monomer]_0/[EBiB]_0 \times conversion \times M_{monomer}$ ).<sup>d</sup> Determined by GPC in THF, based on linear PMMA as calibration standard.



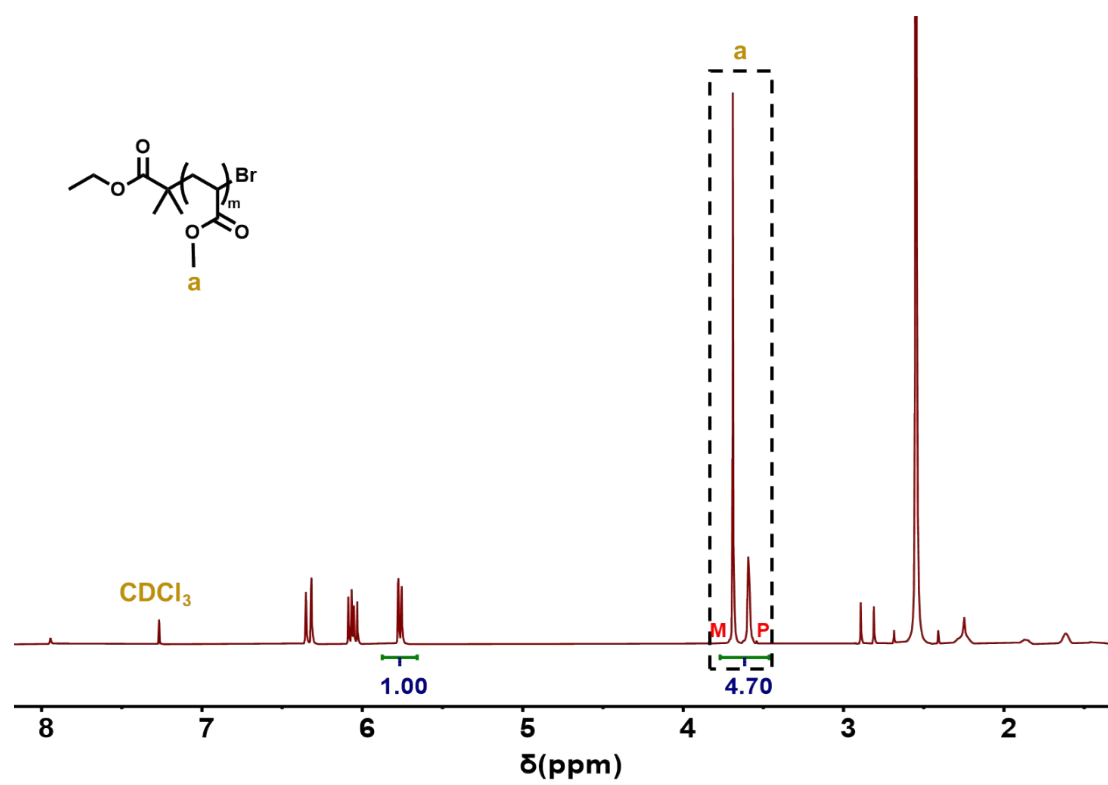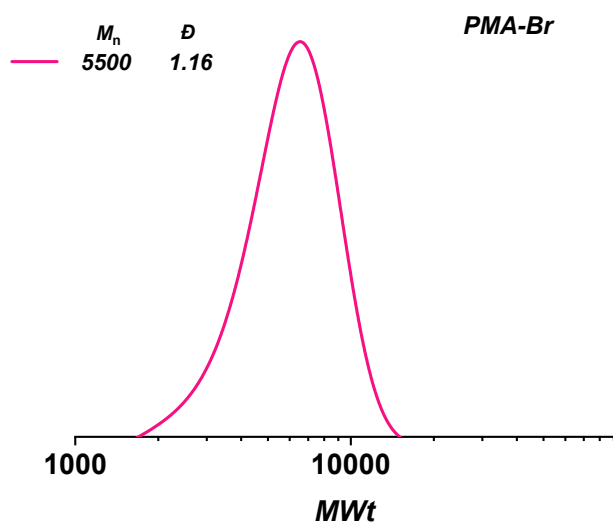

**Figure S22.** Conversion analysis by  $^1\text{H NMR}$  (CDCl<sub>3</sub>) of reaction mixture of SAP-ATRP of MA in 50% v/v DMSO, and the GPC trace.

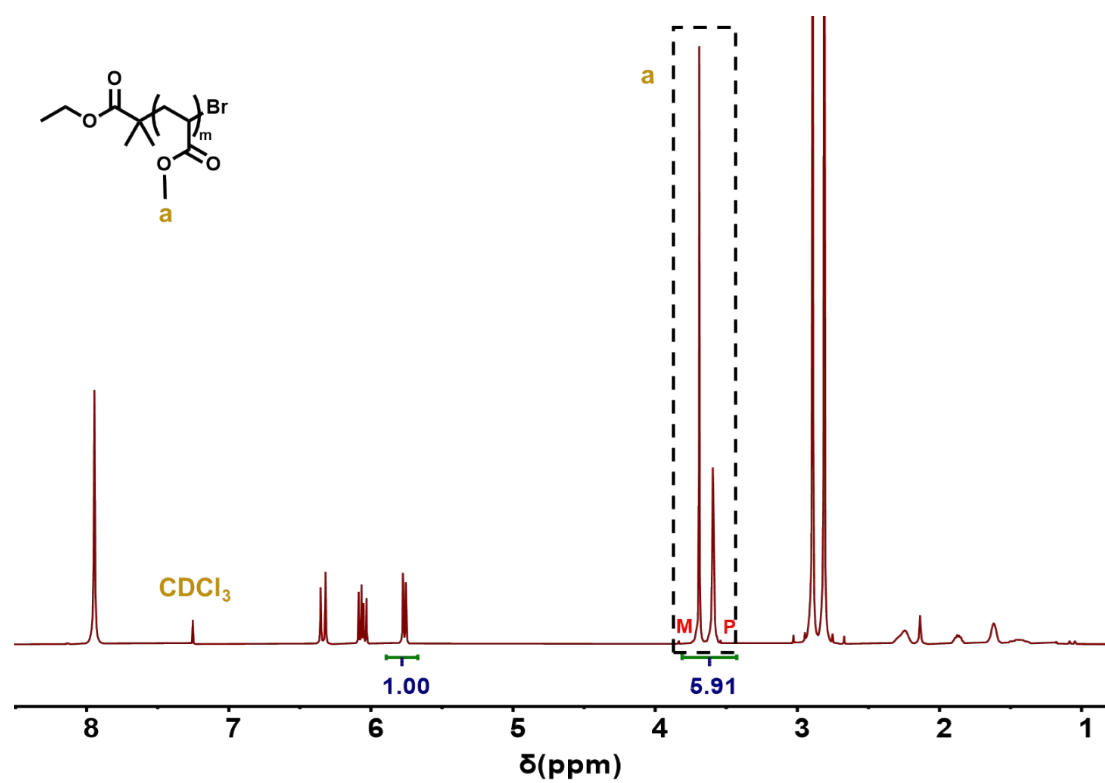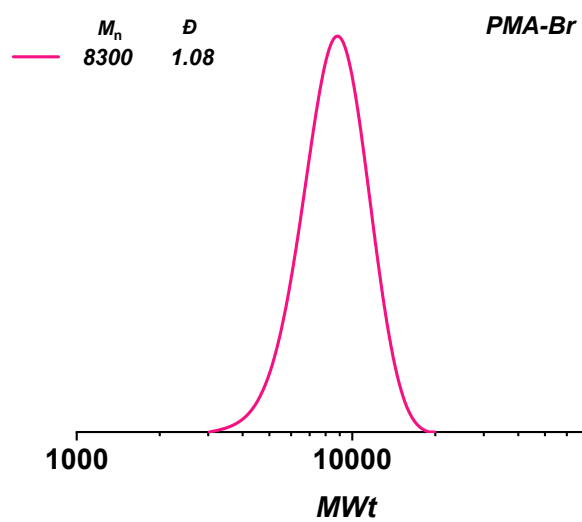

**Figure S23.** Conversion analysis by  $^1\text{H}$  NMR ( $\text{CDCl}_3$ ) of reaction mixture of SAP-ATRP of MA in 50% v/v DMF, and the GPC trace.

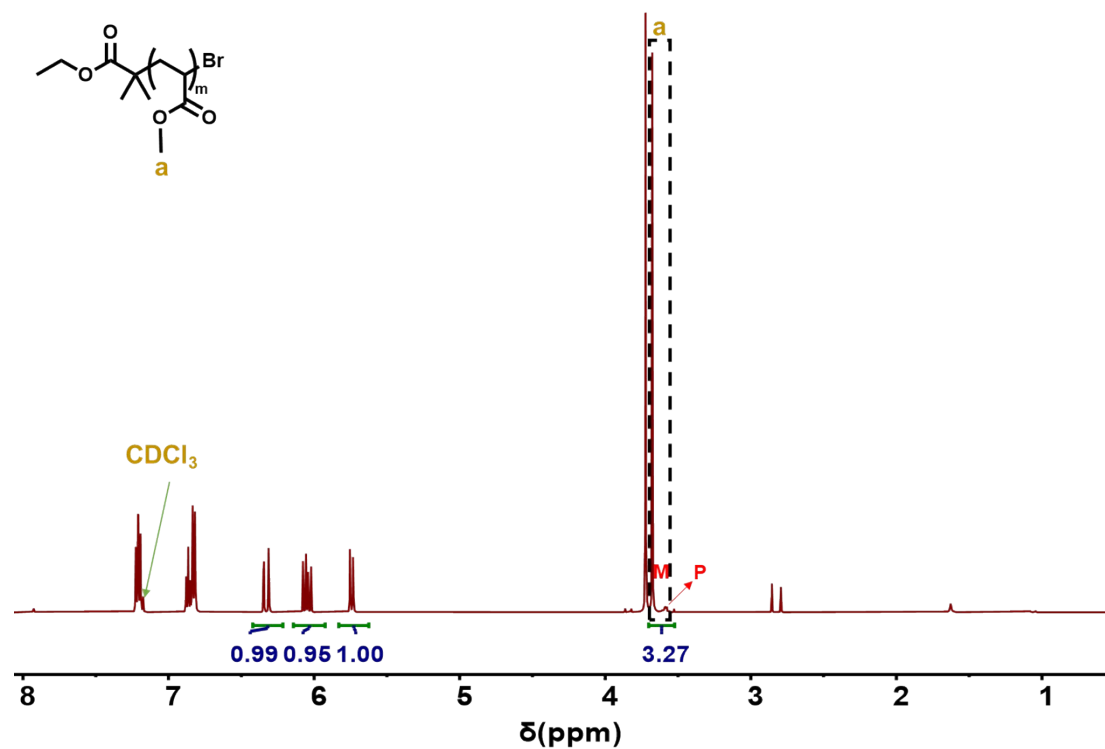

**Figure S24.** Conversion analysis by  $^1\text{H}$  NMR ( $\text{CDCl}_3$ ) of reaction mixture of SAP-ATRP of MA

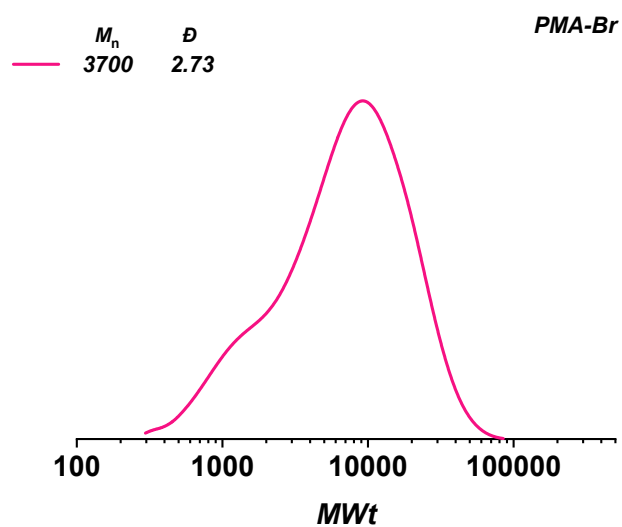

in 50% v/v anisole and the GPC trace.

- 1) Xia, J.; Matyjaszewski, K. Controlled/"Living" Radical Polymerization. Atom Transfer Radical Polymerization Catalyzed by Copper(I) and Picolylamine Complexes. *Macromolecules* **1999**, *32*, 2434-2437.
